# Supplementary material for: A highly hydroxylated 6-tin oxide cluster serves as an efficient e-beam and EUV-photoresist to achieve high-resolution patterns
Source: Royal Society of Chemistry journal article supplement (doi:10.1039/d4na00651h), 2025-01-01
Supplement: d4na00651h1.pdf [file d4na00651h1.pdf]

## *Supporting Information*

### **A Highly Hydroxylated 6-Tin Oxide Cluster Serves as An Efficient E-beam and EUV-Photoresists to Reach High-resolution Patterns**

Cheng-Dun Li,<sup>a</sup> Chun-Fu Chou,<sup>a</sup> Yu-Fang Tseng,<sup>a</sup> Burn-Jeng Lin,<sup>b,c\*</sup> Tsai-Sheng Gau,<sup>b,c</sup> Po-Hsiung Chen,<sup>b,c</sup> Po-Wen Chiu<sup>b,c</sup> Sun-Zen Chen,<sup>d</sup> Shin-Lin Tsai<sup>e</sup>, Wen-Bin Jian,<sup>e</sup> and Jui-Hsiung Liu<sup>a,c\*</sup>

Department of Chemistry,<sup>a</sup> TSMC-NTHU Joint Research Center,<sup>b</sup> College of Semiconductor Research<sup>c</sup>, Center for Nanotechnology, Materials Science and Microsystem,<sup>d</sup> National Tsing Hua University, Hsinchu, 300044, Taiwan

Department of Electrophysics,<sup>e</sup> National Yang Ming Chao Tung University. Hsinchu, 300013, Taiwan

#### Content:

|                                                                                     |     |
|-------------------------------------------------------------------------------------|-----|
| 1. Representative Synthetic procedures -----                                        | s1  |
| 2. Powder X-ray diffraction pattern for cluster (2) -----                           | s2  |
| 3. ESI(+)-MS of photoresist 2 -----                                                 | s2  |
| 4. SEM images for cluster (1) EUV lithography patterns -----                        | s3  |
| 5. SEM images for e-beam lithography patterns -----                                 | s4  |
| 6. SEM images for cluster (2) EUV lithography patterns -----                        | s5  |
| 7. Spectral data of key compounds -----                                             | s7  |
| 8. X-ray crystallographic data of cluster (1) -----                                 | s7  |
| 9. <sup>1</sup> H, <sup>13</sup> C and <sup>119</sup> Sn NMR of cluster (1) -----   | s20 |
| 10. <sup>1</sup> H, <sup>13</sup> C, and <sup>119</sup> Sn NMR of cluster (2) ----- | s23 |

## 1. Representative synthetic procedures

Unless otherwise noted, all reactions were carried out under nitrogen atmosphere in oven-dried glassware using standard syringe, cannula and septa apparatus. Dichloromethane and toluene were dried over  $\text{CaH}_2$  and distilled. Reagents were purchased from commercial sources and used without purification, unless otherwise stated.  $^1\text{H}$  NMR and  $^{13}\text{C}$  NMR spectra were recorded on a Bruker 400 MHz and Bruker 500 MHz spectrometers using chloroform-d ( $\text{CDCl}_3$ ) as the internal standard. The ESI-Mass were performed using JEOL JMS-700. The EA analysis was performed by elemental vario EL cube. The TGA were performed using Mettler-Toledo 2-HT. FTIR Spectroscopy of powder samples was in a Bruker Vertex 80v spectrometer. The AFM measurements were using SEIKO SPA-300HV. Electron-beam lithography was done by utilizing Elionix ELS-7800 with an accelerating voltage of 80 kV and a beam current of 200 pA. The EUV-IL system at the Swiss Light Sources (SLS), Paul Scherrer Institute, utilizes 13.5 nm EUV light. HRXPS measurements were performed in a ULVAC-PHI Quantera II, with a monochromatic Al  $K\alpha$  source (energy of 1486.7 eV).

## 2. Powder X-ray diffraction pattern

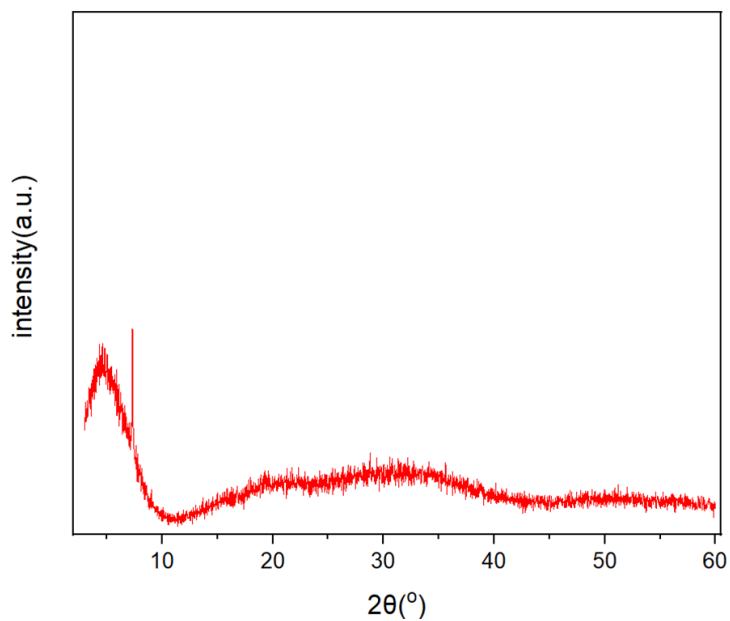

Figure s1A. Powder X-ray diffraction : photoresist 2

## 3. ESI-LC-MS spectrum

Ionization Mode:ESI+  
History:Average(MS[1] 0.95..1.09)

Created:2025/1/6  
Created by:AccuTOF

Charge number:1 Tolerance:500.00[ppm], 500.00 .. 500.... Unsaturation Number:-500.5 .. 500.0 (...)  
Element:<sup>12</sup>C:24 .. 24, <sup>1</sup>H:64 .. 65, <sup>23</sup>Na:0 .. 1, <sup>16</sup>O:14 .. 14, <sup>120</sup>Sn:6 .. 6

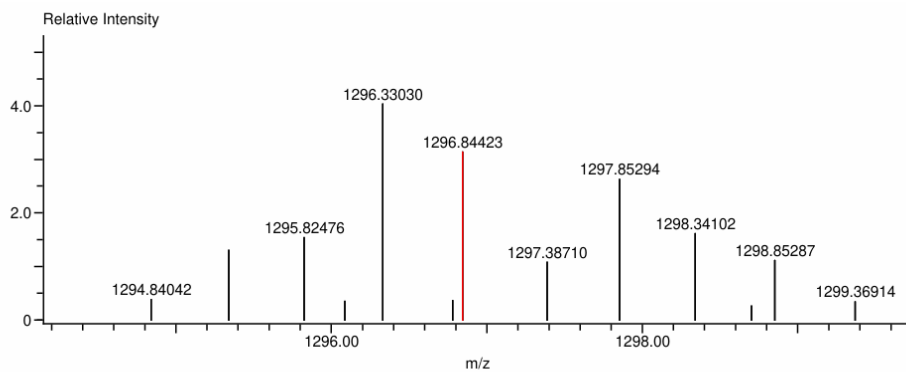

| Mass       | Intensity | Calc. Mass | Mass Difference [mDa] | Mass Difference [ppm] | Possible Formula                                                                                                        |
|------------|-----------|------------|-----------------------|-----------------------|-------------------------------------------------------------------------------------------------------------------------|
| 1296.84423 | 313.73    | 1296.85062 | -6.39                 | -4.92                 | <sup>12</sup> C <sub>24</sub> <sup>1</sup> H <sub>65</sub> <sup>16</sup> O <sub>14</sub> <sup>120</sup> Sn <sub>6</sub> |

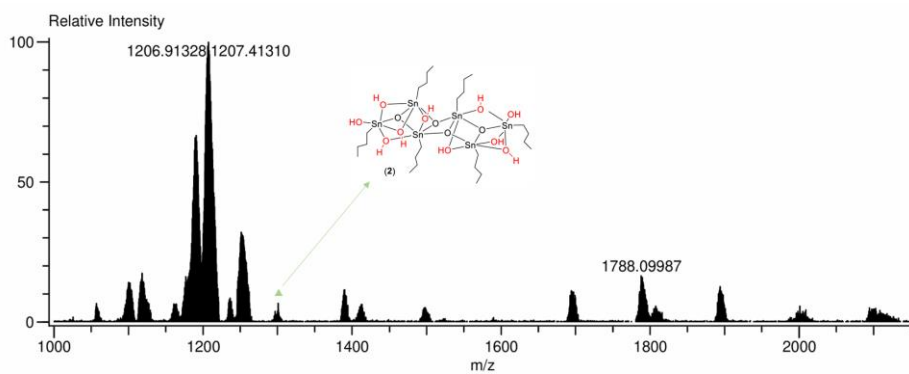

Figure s1B. ESI(+)-MS of photoresist 2

4. SEM images for cluster 1 EUV lithography patterns

| Dose<br>HP           | Dose = 200 mJ/cm <sup>2</sup> , L/S = 0.85<br>HP = 50 nm, CD = 47 nm                | Dose = 200 mJ/cm <sup>2</sup> , L/S = 1.09<br>HP = 34 nm, CD = 35 nm                 | Dose<br>HP           |
|----------------------|-------------------------------------------------------------------------------------|--------------------------------------------------------------------------------------|----------------------|
| Design<br>HP = 50 nm | 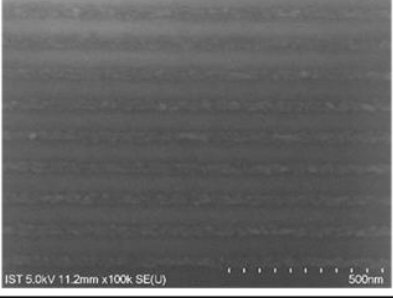   |    | Design<br>HP = 35 nm |
|                      | Dose = 200 mJ/cm <sup>2</sup> , L/S = 1.04<br>HP = 25 nm, CD = 25 nm                | Dose = 200 mJ/cm <sup>2</sup> , L/S = 0.94<br>HP = 22 nm, CD = 21 nm                 |                      |
| Design<br>HP = 25 nm |   |   | Design<br>HP = 22 nm |
| Dose<br>HP           | Dose = 200 mJ/cm <sup>2</sup> , L/S = 1.04<br>HP = 25 nm, CD = 25 nm                | Dose = 200 mJ/cm <sup>2</sup> , L/S = 0.94<br>HP = 22 nm, CD = 21 nm                 | Dose<br>HP           |
| Design<br>HP = 25 nm |  |  | Design<br>HP = 22 nm |
|                      | Dose = 200 mJ/cm <sup>2</sup> , L/S = 0.99<br>HP = 18 nm, CD = 18 nm                | Dose = 200 mJ/cm <sup>2</sup> , L/S = 0.94<br>HP = 16 nm, CD = 16 nm                 |                      |
| Design<br>HP = 18 nm |  |  | Design<br>HP = 16 nm |

Figure s2. SEM images of EUV lithography patterns on photoresist 1 HP= 50-16 nm at different dose. Process parameter: 1.2wt%, THK= 18.2 nm, Developer: Acetone 60 s, PAB=60 °C for 60s, PEB=



wt%, THK= 27.8 nm, PAB=90 °C for 60s, PEB=110 °C for 60s Development: Acetone, 10s. (Dose = 1440, 1760 and  $\mu\text{C}/\text{cm}^2$ ).

6. SEM image of cluster 2 EUV lithography patterns

| Dose<br>HP           | Dose = 73 mJ/cm <sup>2</sup> ,<br>HP = 50 nm                                        | Dose = 66 mJ/cm <sup>2</sup> ,<br>HP = 35 nm                                        | Dose<br>HP           |
|----------------------|-------------------------------------------------------------------------------------|-------------------------------------------------------------------------------------|----------------------|
| Design<br>HP = 50 nm | 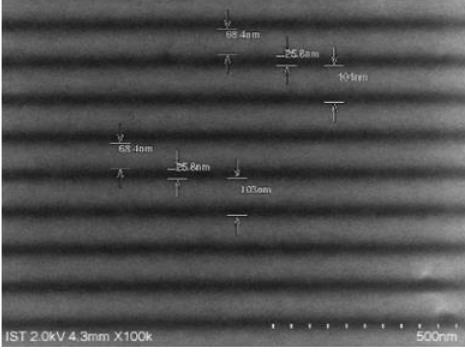   |   | Design<br>HP = 35 nm |
|                      | Dose = 60 mJ/cm <sup>2</sup> ,<br>HP = 25 nm                                        | Dose = 68 mJ/cm <sup>2</sup> ,<br>HP = 19 nm                                        |                      |
| Design<br>HP = 25 nm |   |  | Design<br>HP = 20 nm |
|                      | Dose = 56 mJ/cm <sup>2</sup> ,<br>HP = 16 nm                                        |                                                                                     |                      |
| Design<br>HP = 16 nm |  |                                                                                     |                      |

| Dose<br>HP           | Dose = 66 mJ/cm <sup>2</sup> ,<br>HP = 50 nm                                        | Dose = 70 mJ/cm <sup>2</sup> ,<br>HP = 50 nm                                         |
|----------------------|-------------------------------------------------------------------------------------|--------------------------------------------------------------------------------------|
| Design<br>HP = 50 nm | 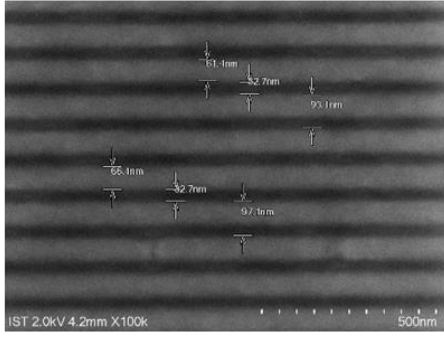   |    |
|                      | Dose = 60 mJ/cm <sup>2</sup> ,<br>HP = 35 nm                                        | Dose = 63 mJ/cm <sup>2</sup> ,<br>HP = 35 nm                                         |
| Design<br>HP = 35 nm |   |   |
|                      | Dose = 55 mJ/cm <sup>2</sup> ,<br>HP = 25 nm                                        | Dose = 58 mJ/cm <sup>2</sup> ,<br>HP = 24 nm                                         |
| Design<br>HP = 25 nm |  |  |
|                      | Dose = 62 mJ/cm <sup>2</sup> ,<br>HP = 20 nm                                        | Dose = 65 mJ/cm <sup>2</sup> ,<br>HP = 19 nm                                         |
| Design<br>HP = 20 nm |  |  |

Figure S4. SEM images of EUV lithography patterns on photoresist 2 HP= 50, 35, 25, 20, 16 nm at different dose. Process parameter: 1.75 wt%, THK= 27.8 nm, Developer: Acetone:Hexane=6:1 , 10s , PEB= 110°C, 90 s.(dose = 55-73 mJ/cm<sup>2</sup>).

## 7. Spectral data of key compounds.

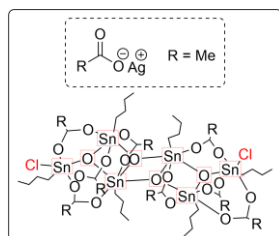

Cluster 1 was purified on recrystallization using DCM/hexane in low temperature. <sup>1</sup>H NMR (400 MHz, CDCl<sub>3</sub>) δ 2.07 (s, 24H), 1.70-1.60 (m, 12H), 1.36-1.22 (m, 24H), 0.89(t, J=7.3, 18H); <sup>13</sup>C NMR (125 MHz, CDCl<sub>3</sub>) δ 182.9, 180.4, 179.6, 179.4, 27.6, 27.3, 27.0, 26.7, 26.5, 26.3, 26.1, 26.0, 24.2, 14.0, 13.8, 13.7, 13.6, 13.5, 13.5, 13.5; <sup>119</sup>Sn NMR (186.362 MHz, CDCl<sub>3</sub>): δ -521.27, -525.42, -557.05. HRMS (ESI<sup>+</sup>) m/z calculated for Sn<sub>6</sub>O<sub>20</sub>C<sub>40</sub>H<sub>78</sub>Cl<sub>2</sub>Na<sub>2</sub> [1/2M+Na]<sub>x2</sub>: 1713.8390, found: 1713.8438.

## 8. X-ray crystallographic structures and data.

### 1.1 X-ray structure of (1)

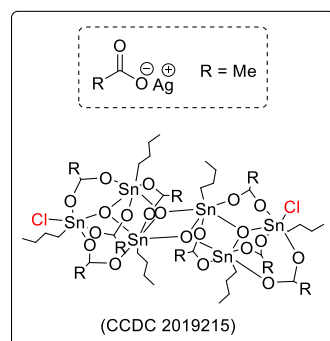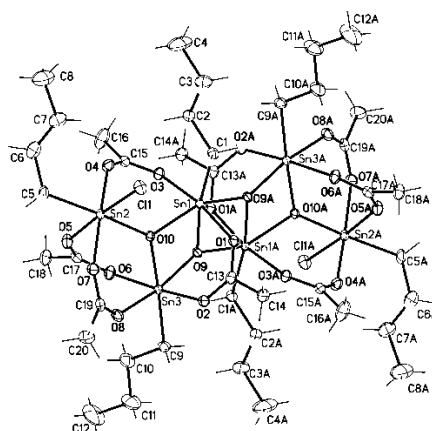

Table 1. Crystal data and structure refinement for 19080/LI\_UM.

|                      |                                                                    |                 |
|----------------------|--------------------------------------------------------------------|-----------------|
| Identification code  | 190807LT_0m                                                        |                 |
| Empirical formula    | C <sub>20</sub> H <sub>39</sub> Cl O <sub>10</sub> Sn <sub>3</sub> |                 |
| Formula weight       | 831.03                                                             |                 |
| Temperature          | 100(2) K                                                           |                 |
| Wavelength           | 0.71073 Å                                                          |                 |
| Crystal system       | Triclinic                                                          |                 |
| Space group          | P-1                                                                |                 |
| Unit cell dimensions | a = 8.5238(3) Å                                                    | α = 86.917(2)°. |
|                      | b = 12.4341(5) Å                                                   | β = 80.685(2)°. |



|                                         |                                                              |                              |
|-----------------------------------------|--------------------------------------------------------------|------------------------------|
|                                         | $c = 14.2811(6) \text{ \AA}$                                 | $\gamma = 81.456(2)^\circ$ . |
| Volume                                  | $1476.37(10) \text{ \AA}^3$                                  |                              |
| Z                                       | 2                                                            |                              |
| Density (calculated)                    | $1.869 \text{ Mg/m}^3$                                       |                              |
| Absorption coefficient                  | $2.653 \text{ mm}^{-1}$                                      |                              |
| F(000)                                  | 812                                                          |                              |
| Crystal size                            | $0.10 \times 0.03 \times 0.03 \text{ mm}^3$                  |                              |
| Theta range for data collection         | $1.657 \text{ to } 26.407^\circ$ .                           |                              |
| Index ranges                            | $-10 \leq h \leq 10, -15 \leq k \leq 15, -17 \leq l \leq 17$ |                              |
| Reflections collected                   | 19788                                                        |                              |
| Independent reflections                 | 6033 [R(int) = 0.0266]                                       |                              |
| Completeness to $\theta = 25.242^\circ$ | 99.7 %                                                       |                              |
| Absorption correction                   | Semi-empirical from equivalents                              |                              |
| Max. and min. transmission              | 0.7454 and 0.6523                                            |                              |
| Refinement method                       | Full-matrix least-squares on $F^2$                           |                              |
| Data / restraints / parameters          | 6033 / 0 / 314                                               |                              |
| Goodness-of-fit on $F^2$                | 1.126                                                        |                              |
| Final R indices [ $I > 2\sigma(I)$ ]    | R1 = 0.0210, wR2 = 0.0575                                    |                              |
| R indices (all data)                    | R1 = 0.0240, wR2 = 0.0593                                    |                              |
| Extinction coefficient                  | n/a                                                          |                              |
| Largest diff. peak and hole             | $1.445 \text{ and } -0.582 \text{ e.\AA}^{-3}$               |                              |

Table 2. Atomic coordinates ( $\times 10^4$ ) and equivalent isotropic displacement parameters ( $\text{\AA}^2 \times 10^3$ ) for 190807LT\_0M.  $U(\text{eq})$  is defined as one third of the trace of the orthogonalized  $U^{ij}$  tensor.

|       | x       | y       | z       | U(eq) |
|-------|---------|---------|---------|-------|
| Sn(1) | 6396(1) | 3815(1) | 6663(1) | 13(1) |
| Sn(2) | 5278(1) | 6309(1) | 7987(1) | 11(1) |
| Sn(3) | 6091(1) | 4138(1) | 9241(1) | 10(1) |
| Cl(1) | 8994(1) | 2935(1) | 7004(1) | 24(1) |
| O(1)  | 4055(2) | 4714(2) | 6411(1) | 19(1) |
| O(2)  | 3152(2) | 5934(2) | 7539(1) | 17(1) |
| O(3)  | 6207(2) | 4707(2) | 7809(1) | 12(1) |
| O(4)  | 4706(2) | 5642(2) | 9318(1) | 12(1) |
| O(5)  | 3990(2) | 3440(2) | 9053(1) | 15(1) |
| O(6)  | 4888(3) | 2801(2) | 7592(1) | 19(1) |
| O(7)  | 6317(2) | 6603(2) | 6528(1) | 18(1) |

|       |         |         |         |       |
|-------|---------|---------|---------|-------|
| O(8)  | 7534(3) | 5057(2) | 5832(1) | 20(1) |
| O(9)  | 7563(2) | 6521(2) | 8342(1) | 16(1) |
| O(10) | 8100(2) | 5014(2) | 9251(1) | 15(1) |
| C(1)  | 2965(3) | 5362(2) | 6874(2) | 16(1) |
| C(2)  | 3850(3) | 2935(2) | 8336(2) | 17(1) |
| C(3)  | 1301(4) | 5463(3) | 6619(2) | 24(1) |
| C(4)  | 7263(4) | 6083(2) | 5882(2) | 16(1) |
| C(5)  | 8135(4) | 6724(3) | 5099(2) | 28(1) |
| C(6)  | 8380(3) | 5929(2) | 8895(2) | 14(1) |
| C(7)  | 9808(3) | 6358(3) | 9140(2) | 19(1) |
| C(8)  | 4394(4) | 8001(2) | 8077(2) | 20(1) |
| C(9)  | 3031(4) | 8376(3) | 7503(3) | 32(1) |
| C(10) | 2462(5) | 9588(3) | 7531(3) | 42(1) |
| C(11) | 1105(6) | 9930(4) | 6948(4) | 66(2) |
| C(12) | 6357(4) | 2942(3) | 5427(2) | 22(1) |
| C(13) | 5958(5) | 1801(3) | 5538(3) | 40(1) |
| C(14) | 7108(6) | 963(3)  | 5956(3) | 46(1) |
| C(15) | 6860(7) | -194(3) | 5903(4) | 67(2) |
| C(16) | 2343(4) | 2446(4) | 8362(3) | 41(1) |
| C(17) | 7638(3) | 2642(2) | 9382(2) | 15(1) |
| C(18) | 7052(4) | 1593(2) | 9193(2) | 18(1) |
| C(19) | 8240(4) | 595(3)  | 9383(3) | 30(1) |
| C(20) | 7671(6) | -459(3) | 9192(4) | 57(1) |

Table 3. Bond lengths [ $\text{\AA}$ ] and angles [ $^\circ$ ] for 190807LT\_0M.

|             |            |
|-------------|------------|
| Sn(1)-O(3)  | 1.9980(19) |
| Sn(1)-C(12) | 2.129(3)   |
| Sn(1)-O(8)  | 2.147(2)   |
| Sn(1)-O(6)  | 2.179(2)   |
| Sn(1)-O(1)  | 2.2101(19) |
| Sn(1)-Cl(1) | 2.4317(8)  |
| Sn(2)-O(3)  | 2.0454(19) |
| Sn(2)-O(4)  | 2.0464(18) |
| Sn(2)-C(8)  | 2.129(3)   |
| Sn(2)-O(2)  | 2.138(2)   |
| Sn(2)-O(9)  | 2.146(2)   |

|               |            |
|---------------|------------|
| Sn(2)-O(7)    | 2.1632(19) |
| Sn(2)-Sn(3)   | 3.2096(3)  |
| Sn(3)-O(4)    | 2.0568(19) |
| Sn(3)-O(4)#1  | 2.0798(18) |
| Sn(3)-O(3)    | 2.1187(18) |
| Sn(3)-C(17)   | 2.135(3)   |
| Sn(3)-O(5)    | 2.162(2)   |
| Sn(3)-O(10)   | 2.165(2)   |
| Sn(3)-Sn(3)#1 | 3.2815(4)  |
| O(1)-C(1)     | 1.260(3)   |
| O(2)-C(1)     | 1.261(4)   |
| O(4)-Sn(3)#1  | 2.0798(18) |
| O(5)-C(2)     | 1.260(3)   |
| O(6)-C(2)     | 1.270(4)   |
| O(7)-C(4)     | 1.260(3)   |
| O(8)-C(4)     | 1.266(4)   |
| O(9)-C(6)     | 1.270(3)   |
| O(10)-C(6)    | 1.260(3)   |
| C(1)-C(3)     | 1.506(4)   |
| C(2)-C(16)    | 1.495(4)   |
| C(3)-H(1)     | 0.9800     |
| C(3)-H(2)     | 0.9800     |
| C(3)-H(3)     | 0.9800     |
| C(4)-C(5)     | 1.500(4)   |
| C(5)-H(5)     | 0.9800     |
| C(5)-H(6)     | 0.9800     |
| C(5)-H(4)     | 0.9800     |
| C(6)-C(7)     | 1.496(4)   |
| C(7)-H(8)     | 0.9800     |
| C(7)-H(7)     | 0.9800     |
| C(7)-H(9)     | 0.9800     |
| C(8)-C(9)     | 1.531(5)   |
| C(8)-H(8A)    | 0.9900     |
| C(8)-H(8B)    | 0.9900     |
| C(9)-C(10)    | 1.514(5)   |
| C(9)-H(10)    | 0.9900     |
| C(9)-H(16)    | 0.9900     |
| C(10)-C(11)   | 1.530(6)   |

|                  |            |
|------------------|------------|
| C(10)-H(15)      | 0.9900     |
| C(10)-H(11)      | 0.9900     |
| C(11)-H(12)      | 0.9800     |
| C(11)-H(13)      | 0.9800     |
| C(11)-H(14)      | 0.9800     |
| C(12)-C(13)      | 1.501(5)   |
| C(12)-H(12A)     | 0.9900     |
| C(12)-H(12B)     | 0.9900     |
| C(13)-C(14)      | 1.491(5)   |
| C(13)-H(17)      | 0.9900     |
| C(13)-H(23)      | 0.9900     |
| C(14)-C(15)      | 1.492(6)   |
| C(14)-H(18)      | 0.9900     |
| C(14)-H(19)      | 0.9900     |
| C(15)-H(21)      | 0.9800     |
| C(15)-H(20)      | 0.9800     |
| C(15)-H(22)      | 0.9800     |
| C(16)-H(24)      | 0.9800     |
| C(16)-H(26)      | 0.9800     |
| C(16)-H(25)      | 0.9800     |
| C(17)-C(18)      | 1.516(4)   |
| C(17)-H(17A)     | 0.9900     |
| C(17)-H(17B)     | 0.9900     |
| C(18)-C(19)      | 1.522(4)   |
| C(18)-H(33)      | 0.9900     |
| C(18)-H(27)      | 0.9900     |
| C(19)-C(20)      | 1.515(5)   |
| C(19)-H(31)      | 0.9900     |
| C(19)-H(32)      | 0.9900     |
| C(20)-H(28)      | 0.9800     |
| C(20)-H(30)      | 0.9800     |
| C(20)-H(29)      | 0.9800     |
| O(3)-Sn(1)-C(12) | 174.19(10) |
| O(3)-Sn(1)-O(8)  | 88.80(8)   |
| C(12)-Sn(1)-O(8) | 91.58(10)  |
| O(3)-Sn(1)-O(6)  | 84.85(8)   |
| C(12)-Sn(1)-O(6) | 93.88(11)  |
| O(8)-Sn(1)-O(6)  | 169.35(8)  |

|                    |            |
|--------------------|------------|
| O(3)-Sn(1)-O(1)    | 87.76(7)   |
| C(12)-Sn(1)-O(1)   | 86.45(10)  |
| O(8)-Sn(1)-O(1)    | 88.23(8)   |
| O(6)-Sn(1)-O(1)    | 83.00(8)   |
| O(3)-Sn(1)-Cl(1)   | 88.52(6)   |
| C(12)-Sn(1)-Cl(1)  | 97.28(9)   |
| O(8)-Sn(1)-Cl(1)   | 90.08(6)   |
| O(6)-Sn(1)-Cl(1)   | 98.28(6)   |
| O(1)-Sn(1)-Cl(1)   | 175.95(6)  |
| O(3)-Sn(2)-O(4)    | 77.56(7)   |
| O(3)-Sn(2)-C(8)    | 176.04(10) |
| O(4)-Sn(2)-C(8)    | 106.34(10) |
| O(3)-Sn(2)-O(2)    | 87.30(8)   |
| O(4)-Sn(2)-O(2)    | 92.81(8)   |
| C(8)-Sn(2)-O(2)    | 93.10(10)  |
| O(3)-Sn(2)-O(9)    | 86.46(8)   |
| O(4)-Sn(2)-O(9)    | 88.69(7)   |
| C(8)-Sn(2)-O(9)    | 92.92(10)  |
| O(2)-Sn(2)-O(9)    | 173.12(8)  |
| O(3)-Sn(2)-O(7)    | 87.43(7)   |
| O(4)-Sn(2)-O(7)    | 164.45(8)  |
| C(8)-Sn(2)-O(7)    | 88.63(10)  |
| O(2)-Sn(2)-O(7)    | 90.52(8)   |
| O(9)-Sn(2)-O(7)    | 86.29(8)   |
| O(3)-Sn(2)-Sn(3)   | 40.42(5)   |
| O(4)-Sn(2)-Sn(3)   | 38.65(5)   |
| C(8)-Sn(2)-Sn(3)   | 143.22(8)  |
| O(2)-Sn(2)-Sn(3)   | 98.48(5)   |
| O(9)-Sn(2)-Sn(3)   | 78.56(5)   |
| O(7)-Sn(2)-Sn(3)   | 125.80(5)  |
| O(4)-Sn(3)-O(4)#1  | 75.01(8)   |
| O(4)-Sn(3)-O(3)    | 75.71(7)   |
| O(4)#1-Sn(3)-O(3)  | 150.72(7)  |
| O(4)-Sn(3)-C(17)   | 170.30(9)  |
| O(4)#1-Sn(3)-C(17) | 96.89(9)   |
| O(3)-Sn(3)-C(17)   | 112.18(9)  |
| O(4)-Sn(3)-O(5)    | 88.68(8)   |
| O(4)#1-Sn(3)-O(5)  | 92.89(7)   |

|                      |            |
|----------------------|------------|
| O(3)-Sn(3)-O(5)      | 87.12(7)   |
| C(17)-Sn(3)-O(5)     | 97.16(10)  |
| O(4)-Sn(3)-O(10)     | 85.63(7)   |
| O(4)#1-Sn(3)-O(10)   | 92.36(7)   |
| O(3)-Sn(3)-O(10)     | 84.72(7)   |
| C(17)-Sn(3)-O(10)    | 89.45(9)   |
| O(5)-Sn(3)-O(10)     | 171.00(7)  |
| O(4)-Sn(3)-Sn(2)     | 38.42(5)   |
| O(4)#1-Sn(3)-Sn(2)   | 112.35(5)  |
| O(3)-Sn(3)-Sn(2)     | 38.75(5)   |
| C(17)-Sn(3)-Sn(2)    | 147.43(8)  |
| O(5)-Sn(3)-Sn(2)     | 95.44(5)   |
| O(10)-Sn(3)-Sn(2)    | 75.80(5)   |
| O(4)-Sn(3)-Sn(3)#1   | 37.75(5)   |
| O(4)#1-Sn(3)-Sn(3)#1 | 37.26(5)   |
| O(3)-Sn(3)-Sn(3)#1   | 113.46(5)  |
| C(17)-Sn(3)-Sn(3)#1  | 133.93(8)  |
| O(5)-Sn(3)-Sn(3)#1   | 91.01(5)   |
| O(10)-Sn(3)-Sn(3)#1  | 88.76(5)   |
| Sn(2)-Sn(3)-Sn(3)#1  | 75.520(8)  |
| C(1)-O(1)-Sn(1)      | 135.59(18) |
| C(1)-O(2)-Sn(2)      | 131.19(18) |
| Sn(1)-O(3)-Sn(2)     | 128.58(9)  |
| Sn(1)-O(3)-Sn(3)     | 127.19(9)  |
| Sn(2)-O(3)-Sn(3)     | 100.83(8)  |
| Sn(2)-O(4)-Sn(3)     | 102.93(8)  |
| Sn(2)-O(4)-Sn(3)#1   | 148.92(10) |
| Sn(3)-O(4)-Sn(3)#1   | 104.99(8)  |
| C(2)-O(5)-Sn(3)      | 125.33(18) |
| C(2)-O(6)-Sn(1)      | 136.26(19) |
| C(4)-O(7)-Sn(2)      | 137.48(19) |
| C(4)-O(8)-Sn(1)      | 130.71(19) |
| C(6)-O(9)-Sn(2)      | 127.89(18) |
| C(6)-O(10)-Sn(3)     | 131.27(18) |
| O(1)-C(1)-O(2)       | 125.2(3)   |
| O(1)-C(1)-C(3)       | 117.8(3)   |
| O(2)-C(1)-C(3)       | 117.1(3)   |
| O(5)-C(2)-O(6)       | 125.4(3)   |

|                  |          |
|------------------|----------|
| O(5)-C(2)-C(16)  | 117.6(3) |
| O(6)-C(2)-C(16)  | 117.0(3) |
| C(1)-C(3)-H(1)   | 109.5    |
| C(1)-C(3)-H(2)   | 109.5    |
| H(1)-C(3)-H(2)   | 109.5    |
| C(1)-C(3)-H(3)   | 109.5    |
| H(1)-C(3)-H(3)   | 109.5    |
| H(2)-C(3)-H(3)   | 109.5    |
| O(7)-C(4)-O(8)   | 125.4(3) |
| O(7)-C(4)-C(5)   | 117.8(3) |
| O(8)-C(4)-C(5)   | 116.8(3) |
| C(4)-C(5)-H(5)   | 109.5    |
| C(4)-C(5)-H(6)   | 109.5    |
| H(5)-C(5)-H(6)   | 109.5    |
| C(4)-C(5)-H(4)   | 109.5    |
| H(5)-C(5)-H(4)   | 109.5    |
| H(6)-C(5)-H(4)   | 109.5    |
| O(10)-C(6)-O(9)  | 126.0(3) |
| O(10)-C(6)-C(7)  | 117.3(2) |
| O(9)-C(6)-C(7)   | 116.8(3) |
| C(6)-C(7)-H(8)   | 109.5    |
| C(6)-C(7)-H(7)   | 109.5    |
| H(8)-C(7)-H(7)   | 109.5    |
| C(6)-C(7)-H(9)   | 109.5    |
| H(8)-C(7)-H(9)   | 109.5    |
| H(7)-C(7)-H(9)   | 109.5    |
| C(9)-C(8)-Sn(2)  | 113.9(2) |
| C(9)-C(8)-H(8A)  | 108.8    |
| Sn(2)-C(8)-H(8A) | 108.8    |
| C(9)-C(8)-H(8B)  | 108.8    |
| Sn(2)-C(8)-H(8B) | 108.8    |
| H(8A)-C(8)-H(8B) | 107.7    |
| C(10)-C(9)-C(8)  | 113.7(3) |
| C(10)-C(9)-H(10) | 108.8    |
| C(8)-C(9)-H(10)  | 108.8    |
| C(10)-C(9)-H(16) | 108.8    |
| C(8)-C(9)-H(16)  | 108.8    |
| H(10)-C(9)-H(16) | 107.7    |

|                     |          |
|---------------------|----------|
| C(9)-C(10)-C(11)    | 112.1(4) |
| C(9)-C(10)-H(15)    | 109.2    |
| C(11)-C(10)-H(15)   | 109.2    |
| C(9)-C(10)-H(11)    | 109.2    |
| C(11)-C(10)-H(11)   | 109.2    |
| H(15)-C(10)-H(11)   | 107.9    |
| C(10)-C(11)-H(12)   | 109.5    |
| C(10)-C(11)-H(13)   | 109.5    |
| H(12)-C(11)-H(13)   | 109.5    |
| C(10)-C(11)-H(14)   | 109.5    |
| H(12)-C(11)-H(14)   | 109.5    |
| H(13)-C(11)-H(14)   | 109.5    |
| C(13)-C(12)-Sn(1)   | 119.1(2) |
| C(13)-C(12)-H(12A)  | 107.5    |
| Sn(1)-C(12)-H(12A)  | 107.5    |
| C(13)-C(12)-H(12B)  | 107.5    |
| Sn(1)-C(12)-H(12B)  | 107.5    |
| H(12A)-C(12)-H(12B) | 107.0    |
| C(14)-C(13)-C(12)   | 117.2(3) |
| C(14)-C(13)-H(17)   | 108.0    |
| C(12)-C(13)-H(17)   | 108.0    |
| C(14)-C(13)-H(23)   | 108.0    |
| C(12)-C(13)-H(23)   | 108.0    |
| H(17)-C(13)-H(23)   | 107.2    |
| C(13)-C(14)-C(15)   | 116.6(4) |
| C(13)-C(14)-H(18)   | 108.1    |
| C(15)-C(14)-H(18)   | 108.1    |
| C(13)-C(14)-H(19)   | 108.1    |
| C(15)-C(14)-H(19)   | 108.1    |
| H(18)-C(14)-H(19)   | 107.3    |
| C(14)-C(15)-H(21)   | 109.5    |
| C(14)-C(15)-H(20)   | 109.5    |
| H(21)-C(15)-H(20)   | 109.5    |
| C(14)-C(15)-H(22)   | 109.5    |
| H(21)-C(15)-H(22)   | 109.5    |
| H(20)-C(15)-H(22)   | 109.5    |
| C(2)-C(16)-H(24)    | 109.5    |
| C(2)-C(16)-H(26)    | 109.5    |



|                     |            |
|---------------------|------------|
| H(24)-C(16)-H(26)   | 109.5      |
| C(2)-C(16)-H(25)    | 109.5      |
| H(24)-C(16)-H(25)   | 109.5      |
| H(26)-C(16)-H(25)   | 109.5      |
| C(18)-C(17)-Sn(3)   | 118.30(19) |
| C(18)-C(17)-H(17A)  | 107.7      |
| Sn(3)-C(17)-H(17A)  | 107.7      |
| C(18)-C(17)-H(17B)  | 107.7      |
| Sn(3)-C(17)-H(17B)  | 107.7      |
| H(17A)-C(17)-H(17B) | 107.1      |
| C(17)-C(18)-C(19)   | 112.1(3)   |
| C(17)-C(18)-H(33)   | 109.2      |
| C(19)-C(18)-H(33)   | 109.2      |
| C(17)-C(18)-H(27)   | 109.2      |
| C(19)-C(18)-H(27)   | 109.2      |
| H(33)-C(18)-H(27)   | 107.9      |
| C(20)-C(19)-C(18)   | 112.6(3)   |
| C(20)-C(19)-H(31)   | 109.1      |
| C(18)-C(19)-H(31)   | 109.1      |
| C(20)-C(19)-H(32)   | 109.1      |
| C(18)-C(19)-H(32)   | 109.1      |
| H(31)-C(19)-H(32)   | 107.8      |
| C(19)-C(20)-H(28)   | 109.5      |
| C(19)-C(20)-H(30)   | 109.5      |
| H(28)-C(20)-H(30)   | 109.5      |
| C(19)-C(20)-H(29)   | 109.5      |
| H(28)-C(20)-H(29)   | 109.5      |
| H(30)-C(20)-H(29)   | 109.5      |

---

Symmetry transformations used to generate equivalent atoms:

#1 -x+1,-y+1,-z+2

Table 4. Anisotropic displacement parameters ( $\text{\AA}^2 \times 10^3$ ) for 190807LT\_0M. The anisotropic displacement factor exponent takes the form:  $-2\pi^2 [ h^2 a^{*2} U^{11} + \dots + 2 h k a^* b^* U^{12} ]$

---

|       | U <sup>11</sup> | U <sup>22</sup> | U <sup>33</sup> | U <sup>23</sup> | U <sup>13</sup> | U <sup>12</sup> |
|-------|-----------------|-----------------|-----------------|-----------------|-----------------|-----------------|
| Sn(1) | 14(1)           | 14(1)           | 9(1)            | -2(1)           | -2(1)           | -1(1)           |

---

|       |        |       |       |        |        |        |
|-------|--------|-------|-------|--------|--------|--------|
| Sn(2) | 12(1)  | 12(1) | 9(1)  | 0(1)   | -2(1)  | -1(1)  |
| Sn(3) | 10(1)  | 12(1) | 9(1)  | -1(1)  | -2(1)  | -1(1)  |
| Cl(1) | 20(1)  | 29(1) | 21(1) | -2(1)  | -3(1)  | 2(1)   |
| O(1)  | 19(1)  | 22(1) | 17(1) | -7(1)  | -7(1)  | 4(1)   |
| O(2)  | 13(1)  | 22(1) | 16(1) | -5(1)  | -5(1)  | 0(1)   |
| O(3)  | 14(1)  | 13(1) | 9(1)  | -1(1)  | -3(1)  | -1(1)  |
| O(4)  | 15(1)  | 12(1) | 8(1)  | -1(1)  | -2(1)  | 0(1)   |
| O(5)  | 14(1)  | 16(1) | 15(1) | -3(1)  | -1(1)  | -4(1)  |
| O(6)  | 24(1)  | 18(1) | 16(1) | -3(1)  | -1(1)  | -6(1)  |
| O(7)  | 22(1)  | 20(1) | 11(1) | -1(1)  | 0(1)   | 0(1)   |
| O(8)  | 23(1)  | 22(1) | 14(1) | -2(1)  | 0(1)   | -3(1)  |
| O(9)  | 17(1)  | 17(1) | 16(1) | 2(1)   | -6(1)  | -3(1)  |
| O(10) | 14(1)  | 15(1) | 16(1) | 0(1)   | -3(1)  | -2(1)  |
| C(1)  | 16(2)  | 20(2) | 12(1) | 4(1)   | -3(1)  | -3(1)  |
| C(2)  | 17(2)  | 17(2) | 18(2) | 1(1)   | -5(1)  | -5(1)  |
| C(3)  | 17(2)  | 30(2) | 22(2) | -7(1)  | -6(1)  | 2(1)   |
| C(4)  | 18(2)  | 19(2) | 13(1) | 2(1)   | -5(1)  | -3(1)  |
| C(5)  | 33(2)  | 24(2) | 23(2) | 0(1)   | 8(1)   | -5(2)  |
| C(6)  | 13(1)  | 17(2) | 11(1) | -4(1)  | 1(1)   | -1(1)  |
| C(7)  | 15(2)  | 22(2) | 20(2) | 1(1)   | -4(1)  | -6(1)  |
| C(8)  | 24(2)  | 15(2) | 17(2) | -2(1)  | -1(1)  | 0(1)   |
| C(9)  | 31(2)  | 22(2) | 43(2) | 2(2)   | -11(2) | 6(2)   |
| C(10) | 47(2)  | 29(2) | 43(2) | 6(2)   | -4(2)  | 10(2)  |
| C(11) | 66(3)  | 54(3) | 71(3) | 5(2)   | -22(3) | 32(3)  |
| C(12) | 31(2)  | 20(2) | 16(2) | -6(1)  | -7(1)  | 0(1)   |
| C(13) | 58(3)  | 37(2) | 28(2) | -9(2)  | -10(2) | -11(2) |
| C(14) | 70(3)  | 26(2) | 44(2) | -8(2)  | -19(2) | 0(2)   |
| C(15) | 110(5) | 26(2) | 65(3) | 1(2)   | -12(3) | -10(3) |
| C(16) | 30(2)  | 61(3) | 36(2) | -19(2) | 2(2)   | -26(2) |
| C(17) | 14(1)  | 15(2) | 14(1) | 0(1)   | -3(1)  | -1(1)  |
| C(18) | 19(2)  | 17(2) | 19(2) | -2(1)  | -5(1)  | 0(1)   |
| C(19) | 31(2)  | 18(2) | 38(2) | -1(1)  | -6(2)  | 4(1)   |
| C(20) | 60(3)  | 16(2) | 94(4) | -6(2)  | -12(3) | 0(2)   |

---

Table 5. Hydrogen coordinates ( $\times 10^4$ ) and isotropic displacement parameters ( $\text{\AA}^2 \times 10^{-3}$ ) for 190807LT\_0M.

---

|        | x     | y     | z     | U(eq) |
|--------|-------|-------|-------|-------|
| H(1)   | 1372  | 5453  | 5928  | 35    |
| H(2)   | 677   | 6150  | 6852  | 35    |
| H(3)   | 772   | 4853  | 6912  | 35    |
| H(5)   | 7574  | 6783  | 4547  | 42    |
| H(6)   | 9234  | 6355  | 4921  | 42    |
| H(4)   | 8166  | 7454  | 5316  | 42    |
| H(8)   | 9872  | 7081  | 8841  | 28    |
| H(7)   | 10786 | 5865  | 8908  | 28    |
| H(9)   | 9700  | 6408  | 9830  | 28    |
| H(8A)  | 4007  | 8172  | 8751  | 23    |
| H(8B)  | 5292  | 8419  | 7849  | 23    |
| H(10)  | 3401  | 8173  | 6834  | 39    |
| H(16)  | 2112  | 7985  | 7752  | 39    |
| H(15)  | 3376  | 9983  | 7280  | 50    |
| H(11)  | 2083  | 9795  | 8198  | 50    |
| H(12)  | 1506  | 9793  | 6277  | 100   |
| H(13)  | 716   | 10708 | 7025  | 100   |
| H(14)  | 223   | 9510  | 7169  | 100   |
| H(12A) | 5574  | 3374  | 5062  | 27    |
| H(12B) | 7427  | 2916  | 5030  | 27    |
| H(17)  | 4892  | 1820  | 5939  | 48    |
| H(23)  | 5854  | 1560  | 4904  | 48    |
| H(18)  | 7056  | 1126  | 6633  | 55    |
| H(19)  | 8206  | 1038  | 5633  | 55    |
| H(21)  | 5824  | -304  | 6278  | 101   |
| H(20)  | 7724  | -672  | 6156  | 101   |
| H(22)  | 6869  | -365  | 5240  | 101   |
| H(24)  | 2370  | 2097  | 7759  | 61    |
| H(26)  | 1414  | 3018  | 8461  | 61    |
| H(25)  | 2256  | 1902  | 8884  | 61    |
| H(17A) | 8657  | 2687  | 8947  | 18    |
| H(17B) | 7894  | 2586  | 10037 | 18    |
| H(33)  | 6878  | 1604  | 8524  | 22    |
| H(27)  | 6009  | 1544  | 9603  | 22    |
| H(31)  | 9284  | 647   | 8976  | 36    |

|       |      |       |       |    |
|-------|------|-------|-------|----|
| H(32) | 8410 | 584   | 10053 | 36 |
| H(28) | 7560 | -472  | 8521  | 86 |
| H(30) | 6630 | -511  | 9587  | 86 |
| H(29) | 8456 | -1075 | 9346  | 86 |

---

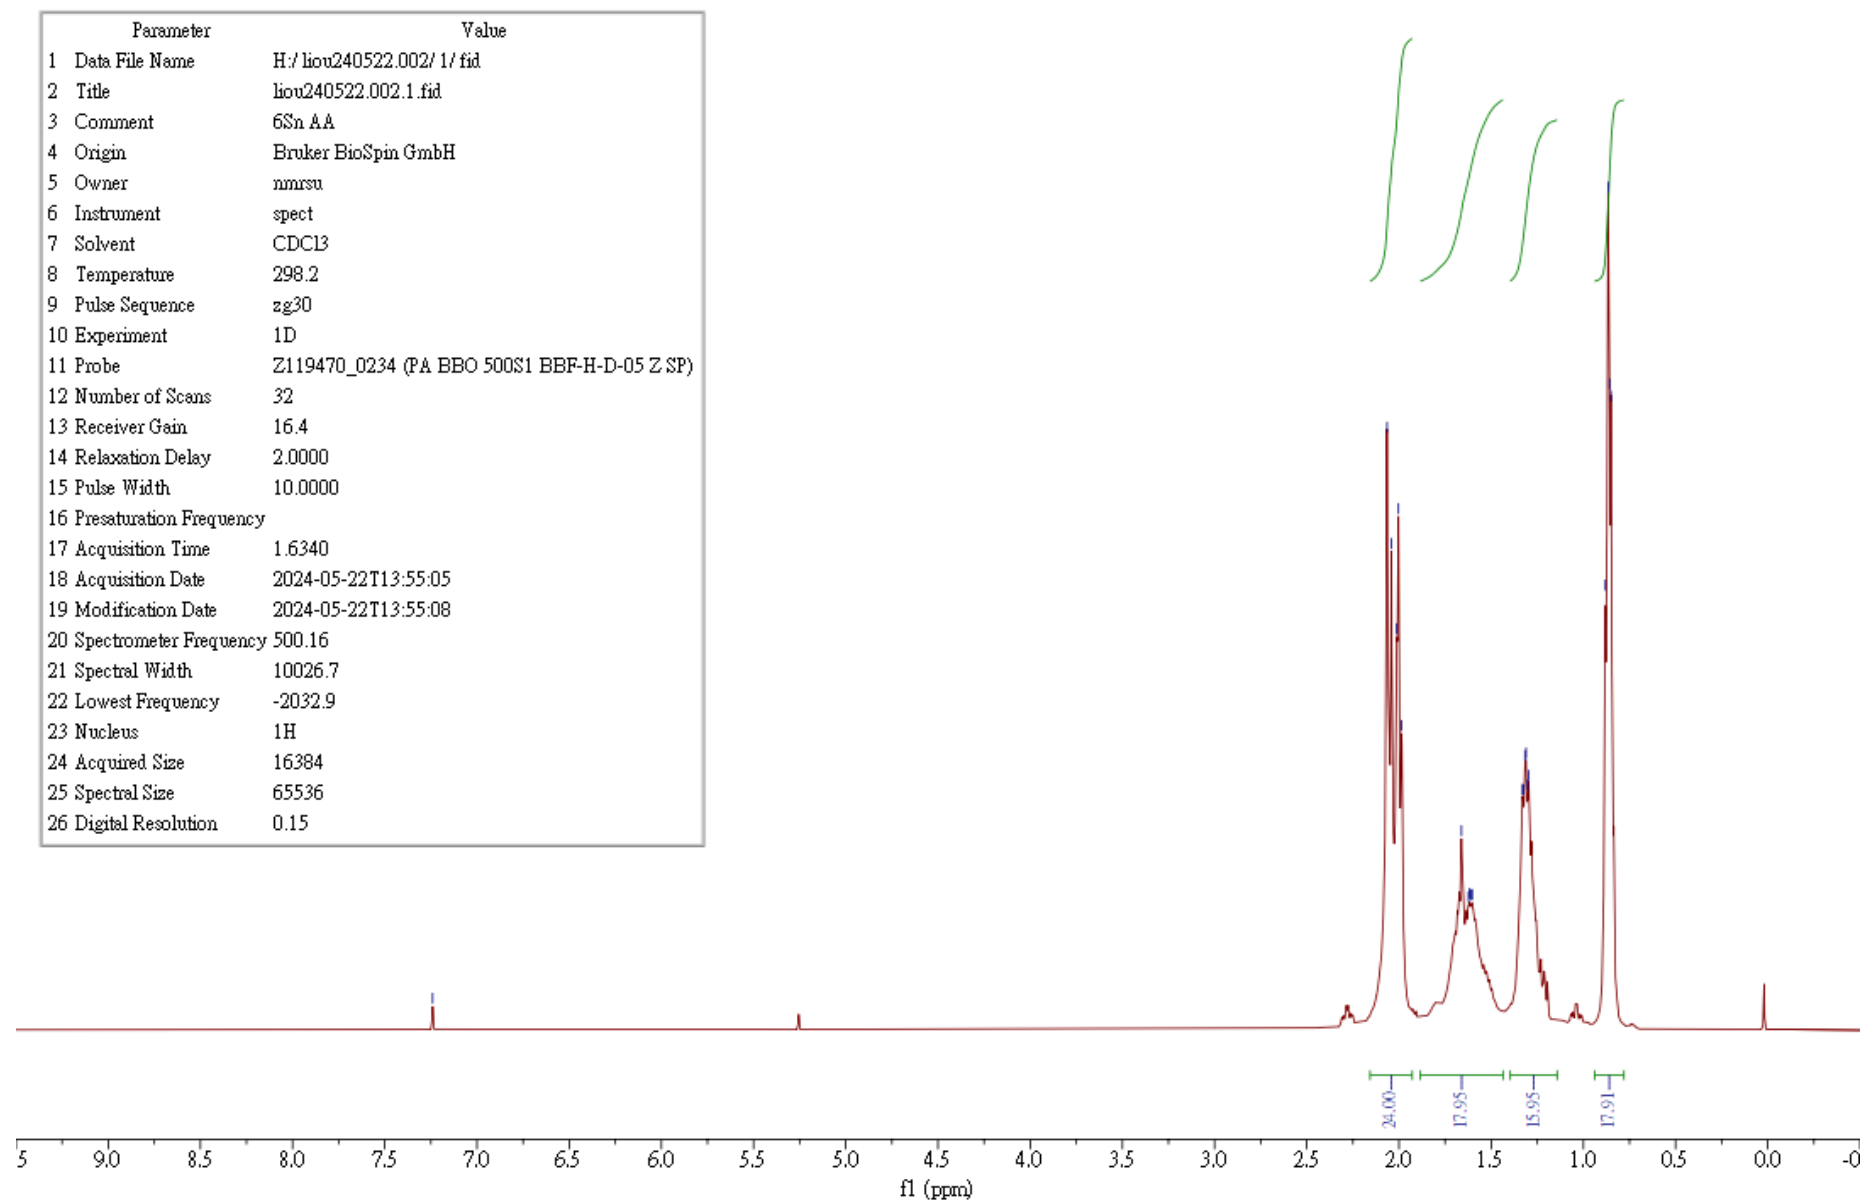

Figure S5. <sup>1</sup>H NMR of cluster 1

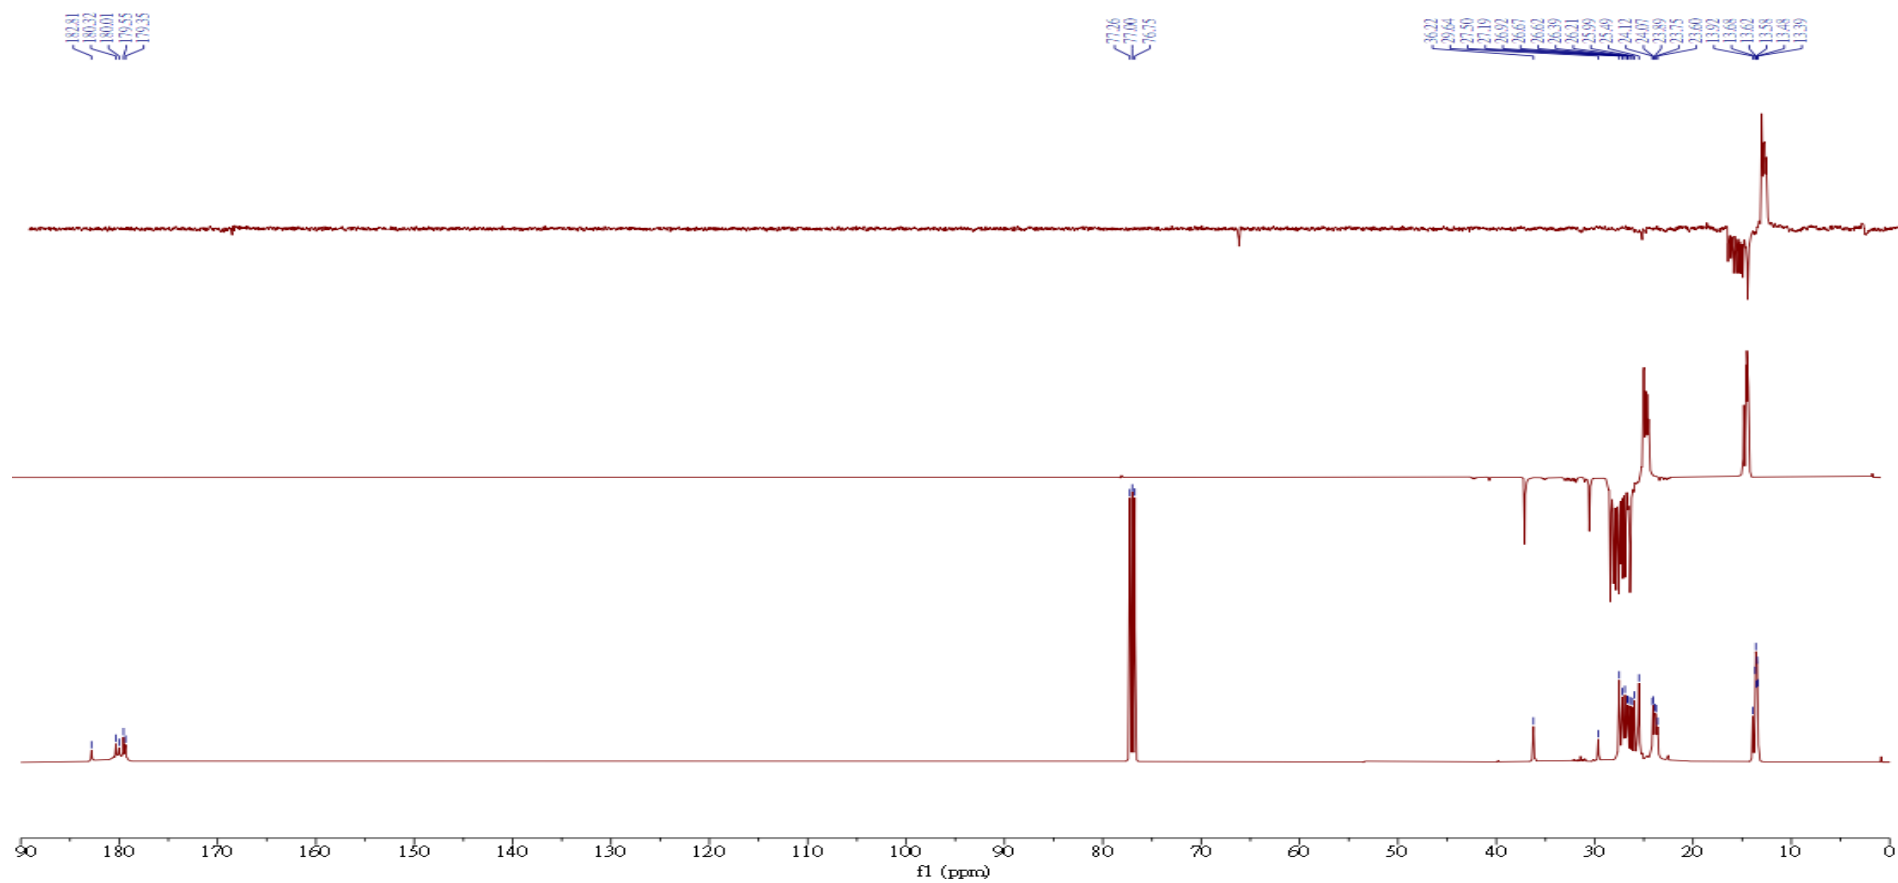

Figure S6. <sup>13</sup>C NMR of cluster 1

-484.85  
-521.07  
-525.33  
-556.89

| Parameter                  | Value                                       |
|----------------------------|---------------------------------------------|
| 1 Data File Name           | H:/liou240522.002/ 5/ fid                   |
| 2 Title                    | liou240522.002.5.fid                        |
| 3 Comment                  | 6Sn AA                                      |
| 4 Origin                   | Bruker BioSpin GmbH                         |
| 5 Owner                    | nmrsu                                       |
| 6 Instrument               | spect                                       |
| 7 Solvent                  | CDCl3                                       |
| 8 Temperature              | 298.9                                       |
| 9 Pulse Sequence           | zgpg                                        |
| 10 Experiment              | 1D                                          |
| 11 Probe                   | Z119470_0234 (PA BBO 500S1 BBF-H-D-05 Z SP) |
| 12 Number of Scans         | 2048                                        |
| 13 Receiver Gain           | 191.0                                       |
| 14 Relaxation Delay        | 2.0000                                      |
| 15 Pulse Width             | 15.0000                                     |
| 16 Presaturation Frequency |                                             |
| 17 Acquisition Time        | 0.0437                                      |
| 18 Acquisition Date        | 2024-05-23T06:57:37                         |
| 19 Modification Date       | 2024-05-23T06:57:38                         |
| 20 Spectrometer Frequency  | 186.51                                      |
| 21 Spectral Width          | 750000.0                                    |
| 22 Lowest Frequency        | -374978.9                                   |
| 23 Nucleus                 | $^{119}\text{Sn}$                           |
| 24 Acquired Size           | 32768                                       |
| 25 Spectral Size           | 65536                                       |
| 26 Digital Resolution      | 11.44                                       |

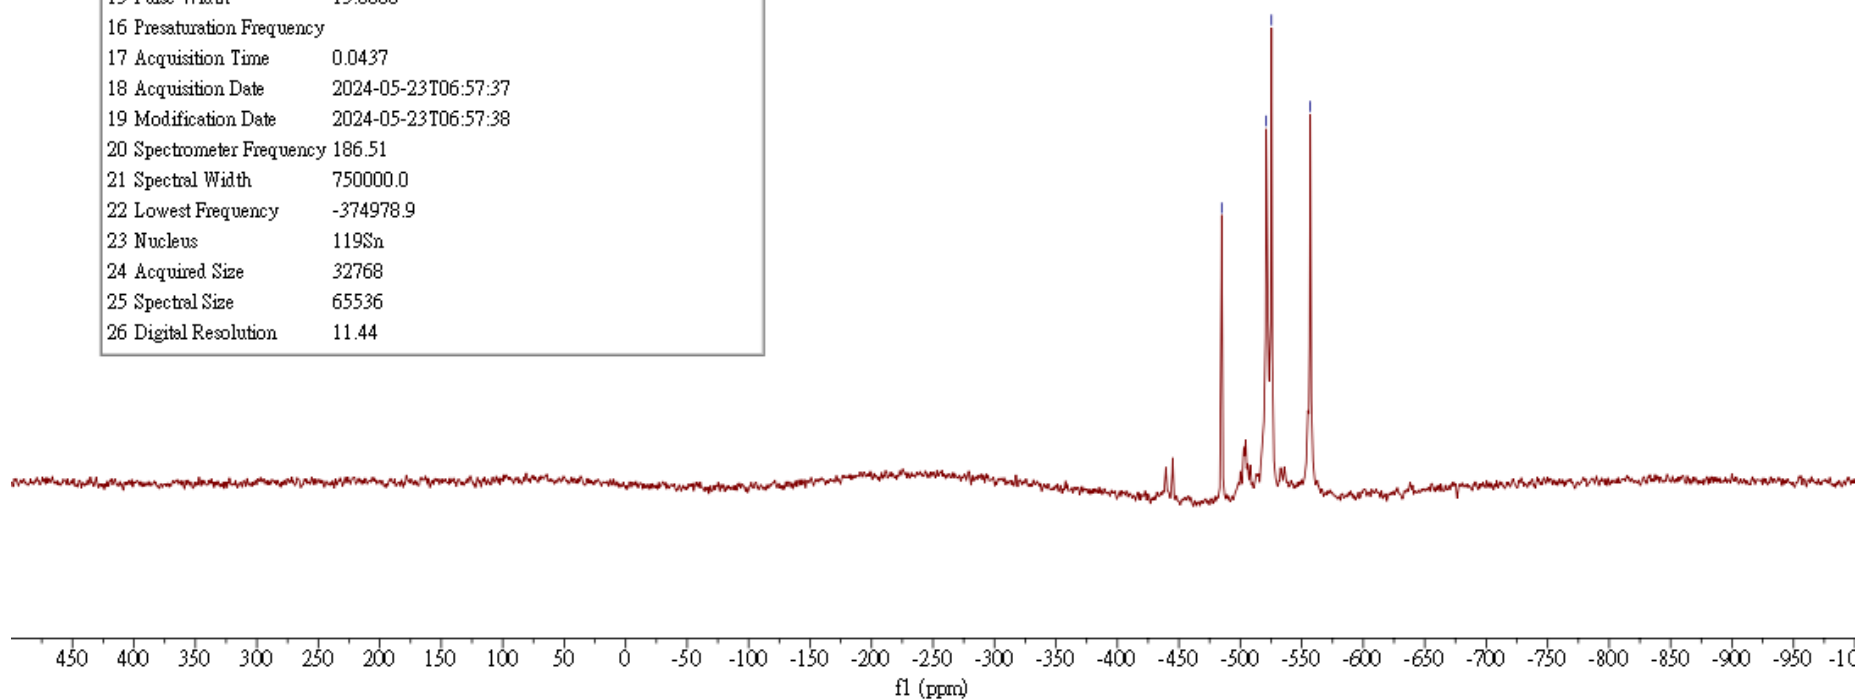

Figure S7.  $^{119}\text{Sn}$  NMR of cluster 1

sample 3.1.fid

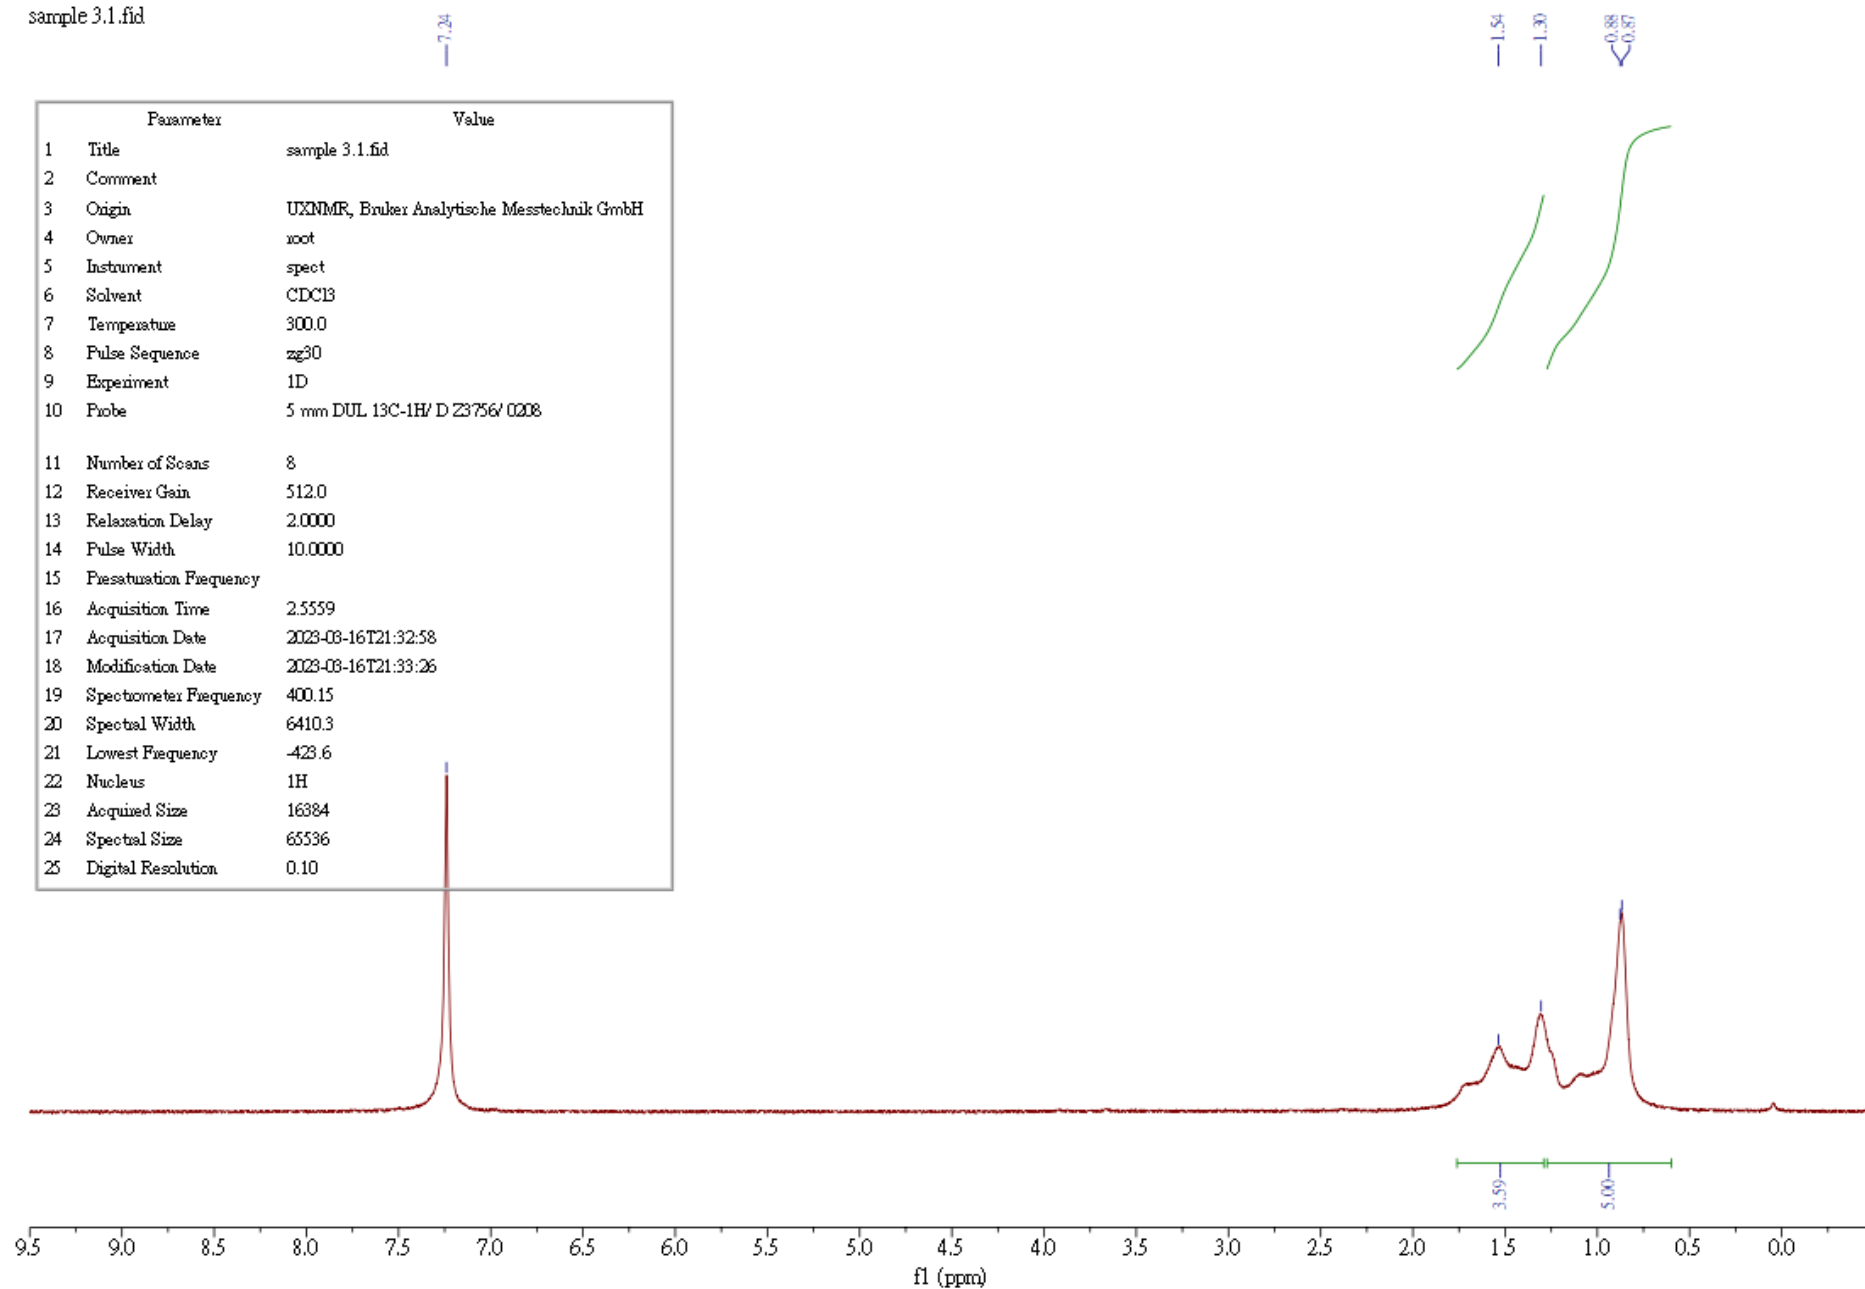

Figure S8. <sup>1</sup>H NMR of cluster 2



liou240522.001.4.fid  
6Sn OH

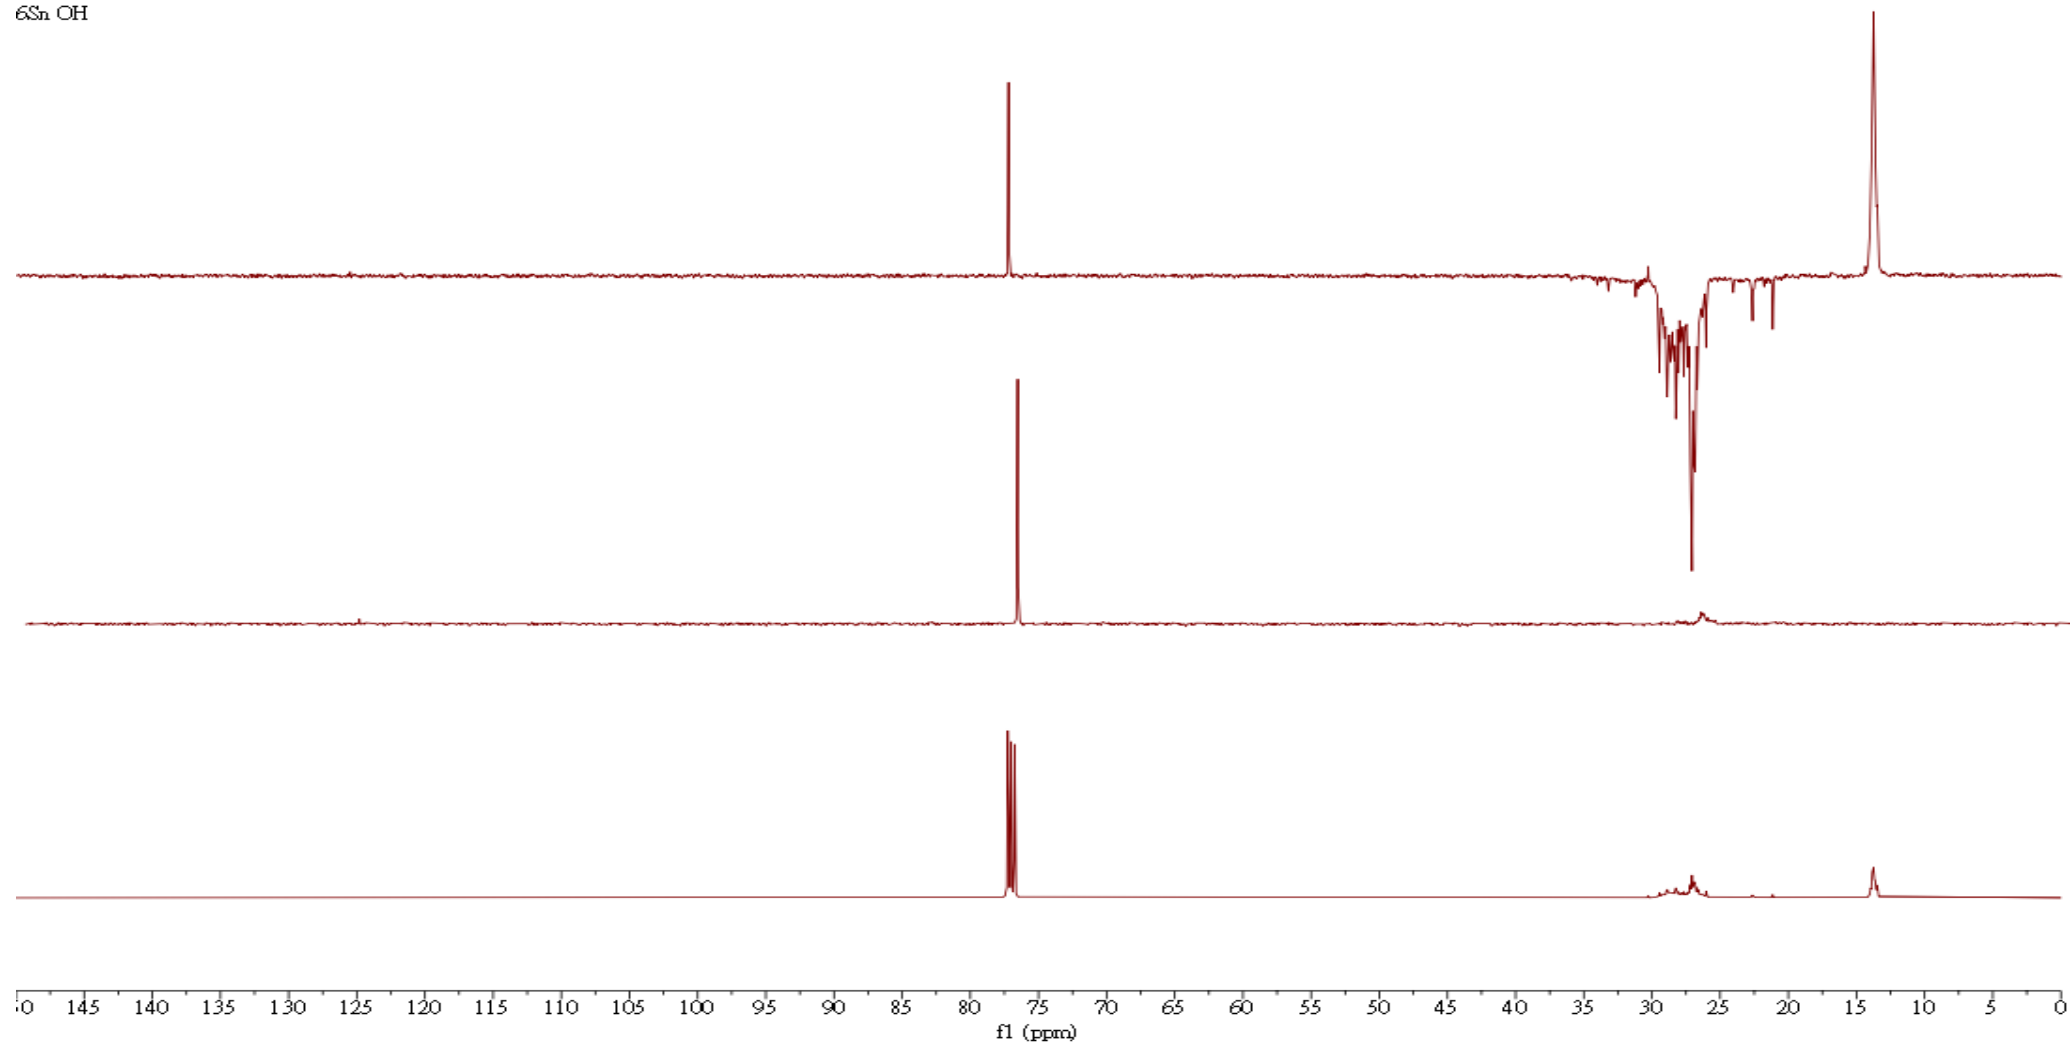

Figure S9.  $^{13}\text{C}$  NMR of cluster 2

451.10  
465.08  
469.89  
485.57

| Parameter                  | Value                                       |
|----------------------------|---------------------------------------------|
| 1 Title                    | liou230921.001.2.fid                        |
| 2 Comment                  | Jeff-06                                     |
| 3 Origin                   | Bruker BioSpin GmbH                         |
| 4 Owner                    | nmrsu                                       |
| 5 Instrument               | spect                                       |
| 6 Solvent                  | CDCl3                                       |
| 7 Temperature              | 233.1                                       |
| 8 Pulse Sequence           | zgpg                                        |
| 9 Experiment               | 1D                                          |
| 10 Probe                   | Z119470_0234 (PA BBO 500S1 BBF-H-D-05 Z SP) |
| 11 Number of Scans         | 4096                                        |
| 12 Receiver Gain           | 191.0                                       |
| 13 Relaxation Delay        | 2.0000                                      |
| 14 Pulse Width             | 15.0000                                     |
| 15 Presaturation Frequency |                                             |
| 16 Acquisition Time        | 0.0437                                      |
| 17 Acquisition Date        | 2023-09-21 T11:38:49                        |
| 18 Modification Date       | 2023-09-21 T11:38:50                        |
| 19 Spectrometer Frequency  | 186.51                                      |
| 20 Spectral Width          | 750000.0                                    |
| 21 Lowest Frequency        | -374978.8                                   |
| 22 Nucleus                 | 119Sn                                       |
| 23 Acquired Size           | 32768                                       |
| 24 Spectral Size           | 65536                                       |
| 25 Digital Resolution      | 11.44                                       |

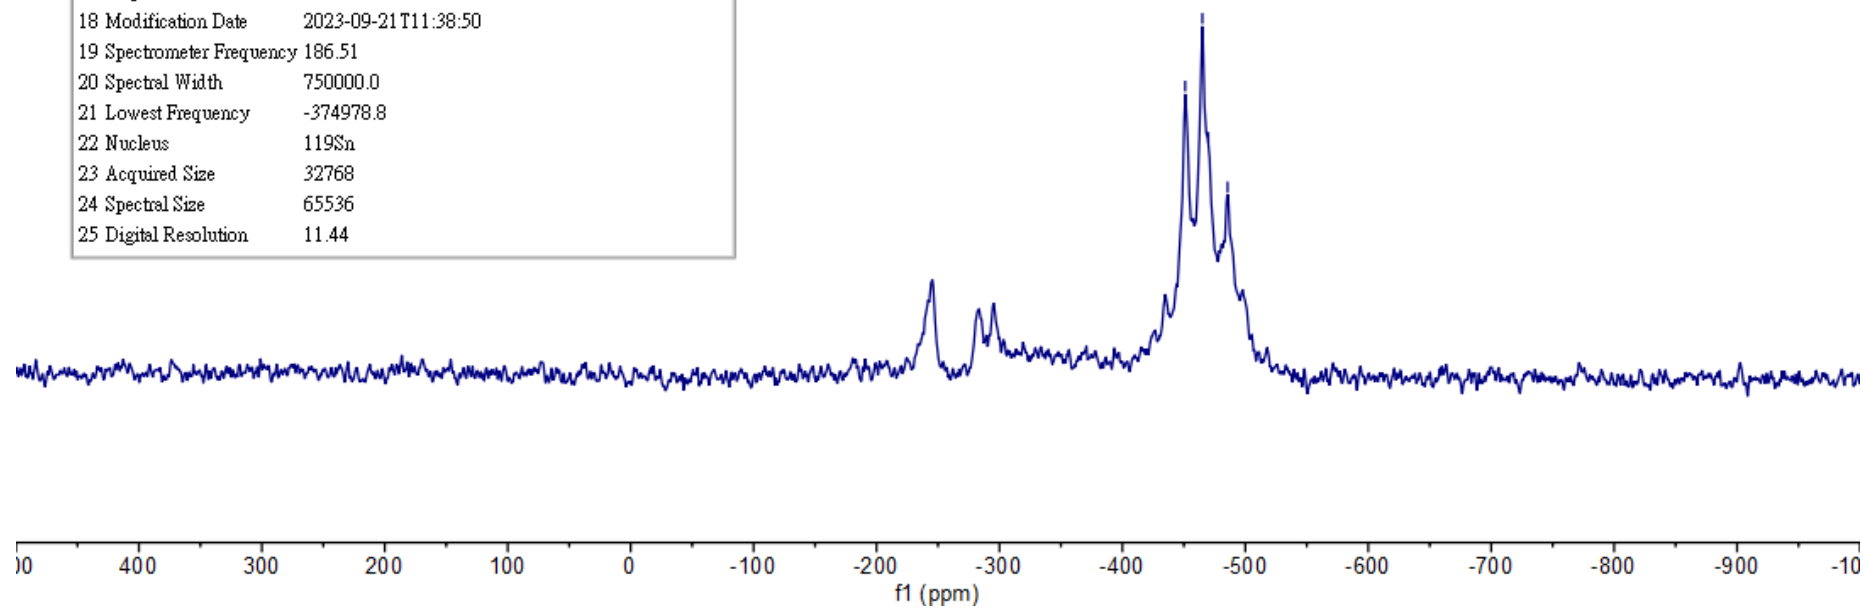

Figure S10. <sup>119</sup>Sn NMR of cluster 2
